# Supplementary material
Source: publisher figshare collection journal article supplement (https://acs.figshare.com/ndownloader/files/4575031)
Supplement: Supplementary file 1 [file 4575031]

# **Supporting Information:**

## **From Borax to Ultralong One-Dimensional Boric Acid**

*Wei Wang<sup>†</sup> , Kezheng Chen<sup>†</sup> , and Zhikun Zhang<sup>\*†</sup>*

Key Laboratory of Nanostructured Materials, Qingdao University of Science & Technology, Qingdao,  
People's Republic of China, 266042

\* To whom correspondence should be addressed. E-mail: zhangzk@qust.edu.cn.

<sup>†</sup> Key Laboratory of Nanostructured Materials.

**Fig. S1** HRTEM image of 1D boric acid micron structures

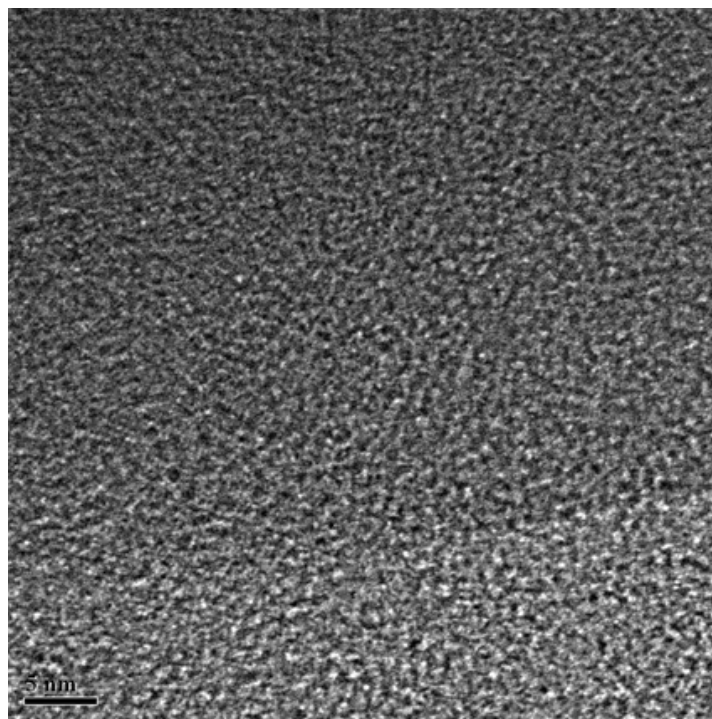

**Fig. S2** SEM images of 1D boric acid micron structures obtained when (A) the pH value is greater than 5 and (B) citric acid is used.

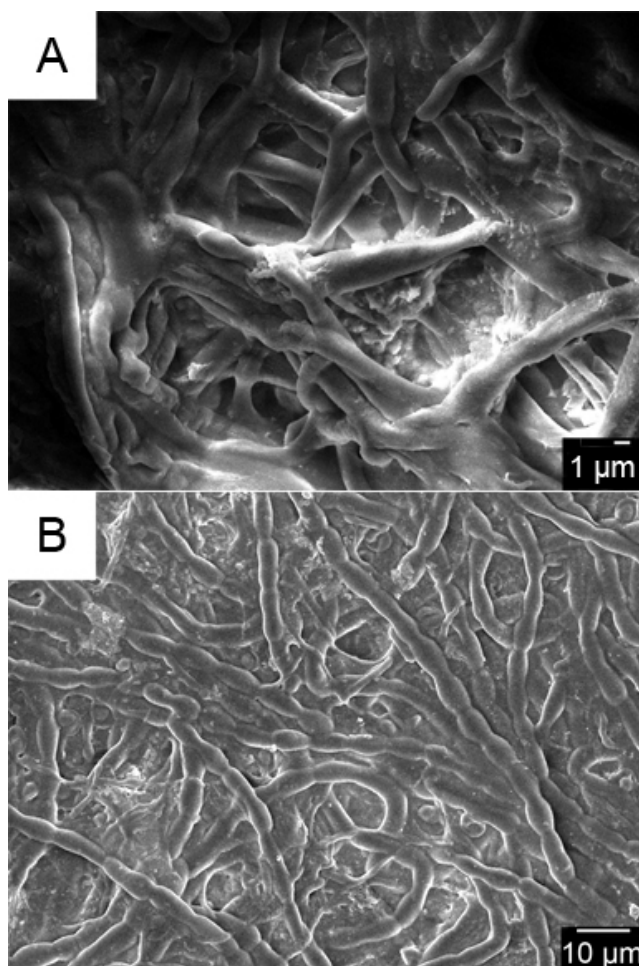

**Fig. S3** Additional TEM images of 1D boric acid micron structures (scale bar is 1  $\mu\text{m}$ )

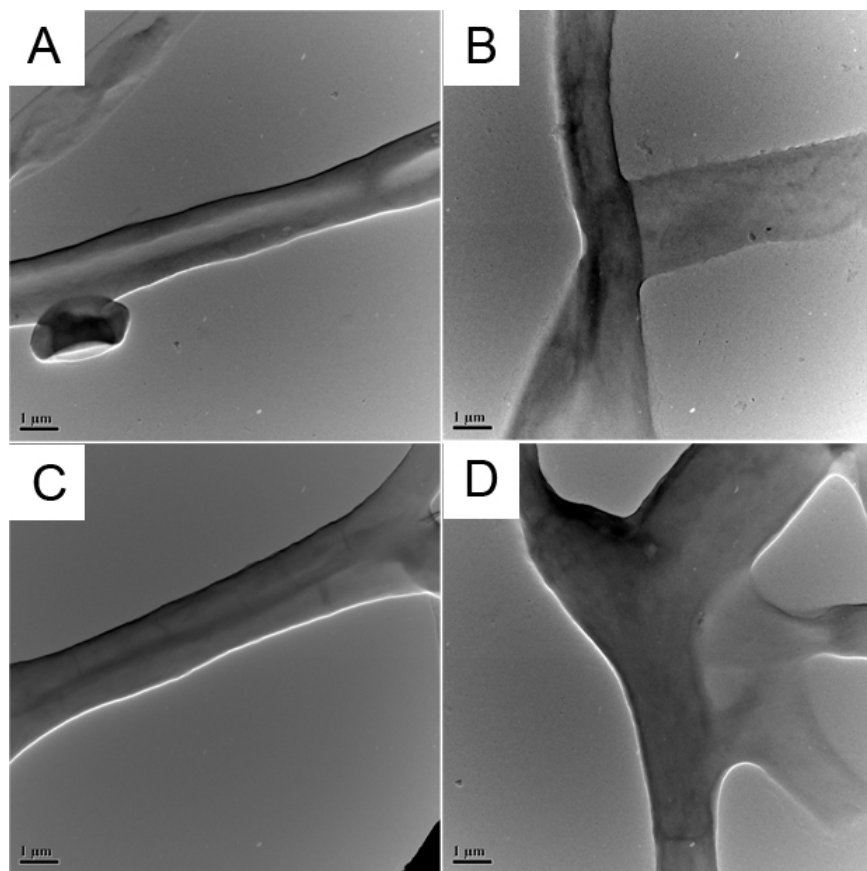

During the TEM observation we found that the edges of unambiguous tube-like structures are not strictly straight as shown in Figure 4D and Figure S3A, which clearly show tube-like structures without question. However, the edges of the 1D structures shown in Figure 4A, the B segment in Figure 4B and the A segment in Figure 4C, are extremely sharp. Our general knowledge tells us that curling of very thin sheets always leads to extremely straight edges, having no waves or bends, which is exactly the case as what we see in Figure 4A-4C. Based on this, we conclude that the black/white contrast along the edges of the 1D structures in Figure 4A, the B segment in Figure 4B and the A segment in Figure 4C should be attributed to curled edges of very thin plate-like structures rather than the shells of tube-like structures or multi-layered structures.
